# Supplementary material for: Relationships between Volunteering, Neighbourhood Deprivation and Mental Wellbeing across Four British Birth Cohorts: Evidence from 10 Years of the UK Household Longitudinal Study
Source: MDPI journal article supplement (doi:10.3390/ijerph19031531), 2022-01-29
Supplement: s1 [file s1]

Table S1 Fixed effects analysis controlling for age only

|                                     | Mental distress (GHQ12) |                     |              | Health-related quality of life (SF12) |                   |              | Number of obs | Number of groups |
|-------------------------------------|-------------------------|---------------------|--------------|---------------------------------------|-------------------|--------------|---------------|------------------|
|                                     | Coef                    | 95%CI               | p-value      | Coef                                  | 95%CI             | p-value      |               |                  |
| Whole sample                        | -0.01                   | -0.02, 0.00         | 0.187        | <b>0.02</b>                           | <b>0.01, 0.04</b> | <b>0.009</b> | 51,206        | 10,989           |
| Pre-1945 (born before 1945)         | -0.02                   | -0.05, 0.00         | 0.080        | <b>0.05</b>                           | <b>0.01, 0.08</b> | <b>0.011</b> | 7,351         | 1,491            |
| Baby Boomers (born in 1945-64)      | <b>-0.03</b>            | <b>-0.05, -0.01</b> | <b>0.005</b> | <b>0.03</b>                           | <b>0.01, 0.05</b> | <b>0.005</b> | 21,809        | 4,431            |
| Gen X (born in 1965-79)             | 0.02                    | -0.01, 0.04         | 0.195        | -0.01                                 | -0.04, 0.02       | 0.493        | 13,256        | 2,702            |
| Millennials (born in 1980 or after) | 0.00                    | -0.04, 0.04         | 0.949        | 0.02                                  | -0.02, 0.06       | 0.327        | 8,790         | 2,365            |

Notes: All models controlled all time-invariant variables. Bold values denote statistical significance at the  $p < 0.05$  level.

**Table S2 Fixed effects analysis predicting the associations between volunteering and mental distress (GHQ-12): volunteered at least once a month vs less**

|                                     | Model 1 Volunteering |                     |              | Model 2 = Model 1 +<br>demography & SEP |                     |              | Model 3 = Model 2 + IMD |                     |              | Number<br>of obs | Number<br>of groups |
|-------------------------------------|----------------------|---------------------|--------------|-----------------------------------------|---------------------|--------------|-------------------------|---------------------|--------------|------------------|---------------------|
|                                     | Coef                 | 95%CI               | p-value      | Coef                                    | 95%CI               | p-value      | Coef                    | 95%CI               | p-value      |                  |                     |
| Whole sample                        | <b>-0.02</b>         | <b>-0.03, -0.00</b> | <b>0.043</b> | <b>-0.02</b>                            | <b>-0.03, -0.00</b> | <b>0.028</b> | <b>-0.02</b>            | <b>-0.03, -0.00</b> | <b>0.029</b> | 51,206           | 10,989              |
| Pre-1945 (born before 1945)         | <b>-0.03</b>         | <b>-0.06, -0.00</b> | <b>0.038</b> | -0.02                                   | -0.05, 0.00         | 0.094        | -0.02                   | -0.05, 0.00         | 0.094        | 7,351            | 1,491               |
| Baby Boomers (born in 1945-64)      | <b>-0.02</b>         | <b>-0.05, -0.00</b> | <b>0.028</b> | <b>-0.03</b>                            | <b>-0.05, -0.00</b> | <b>0.016</b> | <b>-0.03</b>            | <b>-0.05, -0.00</b> | <b>0.016</b> | 21,809           | 4,431               |
| Gen X (born in 1965-79)             | 0.01                 | -0.02, 0.04         | 0.500        | 0.00                                    | -0.02, 0.03         | 0.786        | 0.00                    | -0.02, 0.03         | 0.789        | 13,256           | 2,702               |
| Millennials (born in 1980 or after) | -0.02                | -0.07, 0.02         | 0.316        | -0.02                                   | -0.06, 0.02         | 0.379        | -0.02                   | -0.06, 0.02         | 0.389        | 8,790            | 2,365               |

Notes: All models controlled all time-invariant variables. Model 1 additionally included volunteering engagement. Model 2 = Model 1 + demography (age, partnership status, whether or not living with parents, whether or not living with children, number of close friends, and long-standing illness or impairment) & SEP (education levels, employment statuses, and individual monthly income). Model 3 = Model 2 + IMD (whether or not living in the 20% most deprived areas). Bold values denote statistical significance at the  $p < 0.05$  level.

**Table S3 Fixed effects analysis predicting the associations between volunteering and health-related quality of life (SF-12): volunteered at least once a month vs less**

|                                     | Model 1 Volunteering |                   |              | Model 2 = Model 1 +<br>demography & SEP |                   |              | Model 3 = Model 2 + IMD |                   |              | Number<br>of obs | Number<br>of groups |
|-------------------------------------|----------------------|-------------------|--------------|-----------------------------------------|-------------------|--------------|-------------------------|-------------------|--------------|------------------|---------------------|
|                                     | Coef                 | 95%CI             | p-value      | Coef                                    | 95%CI             | p-value      | Coef                    | 95%CI             | p-value      |                  |                     |
| Whole sample                        | <b>0.02</b>          | <b>0.00, 0.04</b> | <b>0.022</b> | <b>0.02</b>                             | <b>0.00, 0.04</b> | <b>0.039</b> | <b>0.02</b>             | <b>0.00, 0.04</b> | <b>0.039</b> | 51,206           | 10,989              |
| Pre-1945 (born before 1945)         | <b>0.09</b>          | <b>0.05, 0.13</b> | <b>0.000</b> | <b>0.05</b>                             | <b>0.01, 0.08</b> | <b>0.011</b> | <b>0.05</b>             | <b>0.01, 0.08</b> | <b>0.011</b> | 7,351            | 1,491               |
| Baby Boomers (born in 1945-64)      | <b>0.02</b>          | <b>0.00, 0.05</b> | <b>0.039</b> | <b>0.03</b>                             | <b>0.01, 0.05</b> | <b>0.011</b> | <b>0.03</b>             | <b>0.01, 0.05</b> | <b>0.011</b> | 21,809           | 4,431               |
| Gen X (born in 1965-79)             | -0.02                | -0.06, 0.02       | 0.313        | -0.01                                   | -0.05, 0.02       | 0.491        | -0.01                   | -0.05, 0.02       | 0.484        | 13,256           | 2,702               |
| Millennials (born in 1980 or after) | 0.02                 | -0.03, 0.07       | 0.473        | 0.01                                    | -0.03, 0.05       | 0.668        | 0.01                    | -0.04, 0.05       | 0.674        | 8,790            | 2,365               |

Notes: All models controlled all time-invariant variables. Model 1 additionally included volunteering engagement. Model 2 = Model 1 + demography (age, partnership status, whether or not living with parents, whether or not living with children, number of close friends, and long-standing illness or impairment) & SEP (education levels, employment statuses, and individual monthly income). Model 3 = Model 2 + IMD (whether or not living in the 20% most deprived areas). Bold values denote statistical significance at the  $p < 0.05$  level.

Table S4 Fixed effects models interacting with index of multiple deprivation (IMD) 10% most deprived areas

|                                            | Mental distress (GHQ 12) |                     |              | Health-related quality of life (SF-12) |                   |              | Number of obs | Number of groups |
|--------------------------------------------|--------------------------|---------------------|--------------|----------------------------------------|-------------------|--------------|---------------|------------------|
|                                            | Coef                     | 95%CI               | p-value      | Coef                                   | 95%CI             | p-value      |               |                  |
| <b>Whole sample</b>                        |                          |                     |              |                                        |                   |              | 51,206        | 10,989           |
| Volunteering                               | -0.01                    | -0.02, 0.01         | 0.232        | <b>0.02</b>                            | <b>0.01, 0.04</b> | <b>0.004</b> |               |                  |
| IMD 10% most deprived                      | -0.05                    | -0.10, 0.01         | 0.090        | 0.03                                   | -0.05, 0.11       | 0.445        |               |                  |
| Volunteering*IMD 10% most deprived         | -0.05                    | -0.14, 0.03         | 0.202        | 0.06                                   | -0.04, 0.16       | 0.245        |               |                  |
| <b>Pre-1945 (born before 1945)</b>         |                          |                     |              |                                        |                   |              | 7,351         | 1,491            |
| Volunteering                               | -0.02                    | -0.05, 0.00         | 0.068        | <b>0.05</b>                            | <b>0.11, 0.08</b> | <b>0.010</b> |               |                  |
| IMD 10% most deprived                      | -0.10                    | -0.27, 0.07         | 0.237        | -0.10                                  | -0.45, 0.25       | 0.580        |               |                  |
| Volunteering*IMD 10% most deprived         | 0.03                     | -0.08, 0.15         | 0.566        | -0.02                                  | -0.24, 0.20       | 0.863        |               |                  |
| <b>Baby Boomers (born in 1945-64)</b>      |                          |                     |              |                                        |                   |              | 21,809        | 4,431            |
| Volunteering                               | <b>-0.03</b>             | <b>-0.05, -0.01</b> | <b>0.008</b> | <b>0.03</b>                            | <b>0.01, 0.05</b> | <b>0.003</b> |               |                  |
| IMD 10% most deprived                      | 0.04                     | -0.08, 0.15         | 0.526        | -0.09                                  | -0.24, 0.06       | 0.257        |               |                  |
| Volunteering*IMD 10% most deprived         | -0.10                    | -0.25, 0.06         | 0.227        | 0.09                                   | -0.05, 0.23       | 0.203        |               |                  |
| <b>Gen X (born in 1965-79)</b>             |                          |                     |              |                                        |                   |              | 13,256        | 2,702            |
| Volunteering                               | 0.01                     | -0.01, 0.04         | 0.379        | 0.00                                   | -0.03, 0.03       | 0.884        |               |                  |
| IMD 10% most deprived                      | -0.01                    | -0.09, 0.07         | 0.763        | <b>0.11</b>                            | <b>0.00, 0.21</b> | <b>0.045</b> |               |                  |
| Volunteering*IMD 10% most deprived         | 0.00                     | -0.14, 0.14         | 0.980        | -0.09                                  | -0.18, 0.01       | 0.081        |               |                  |
| <b>Millennials (born in 1980 or after)</b> |                          |                     |              |                                        |                   |              | 8,790         | 2,365            |
| Volunteering                               | 0.00                     | -0.03, 0.04         | 0.796        | 0.01                                   | -0.02, 0.05       | 0.462        |               |                  |
| IMD 10% most deprived                      | -0.06                    | -0.14, 0.02         | 0.155        | 0.02                                   | -0.09, 0.14       | 0.672        |               |                  |
| Volunteering*IMD 10% most deprived         | -0.09                    | -0.23, 0.05         | 0.219        | 0.14                                   | -0.05, 0.33       | 0.157        |               |                  |

Notes: All models controlled all variables shown in the in-text analysis. Bold values denote statistical significance at the  $p < 0.05$  level.

Figure S1: Volunteering, mental distress and deprivation

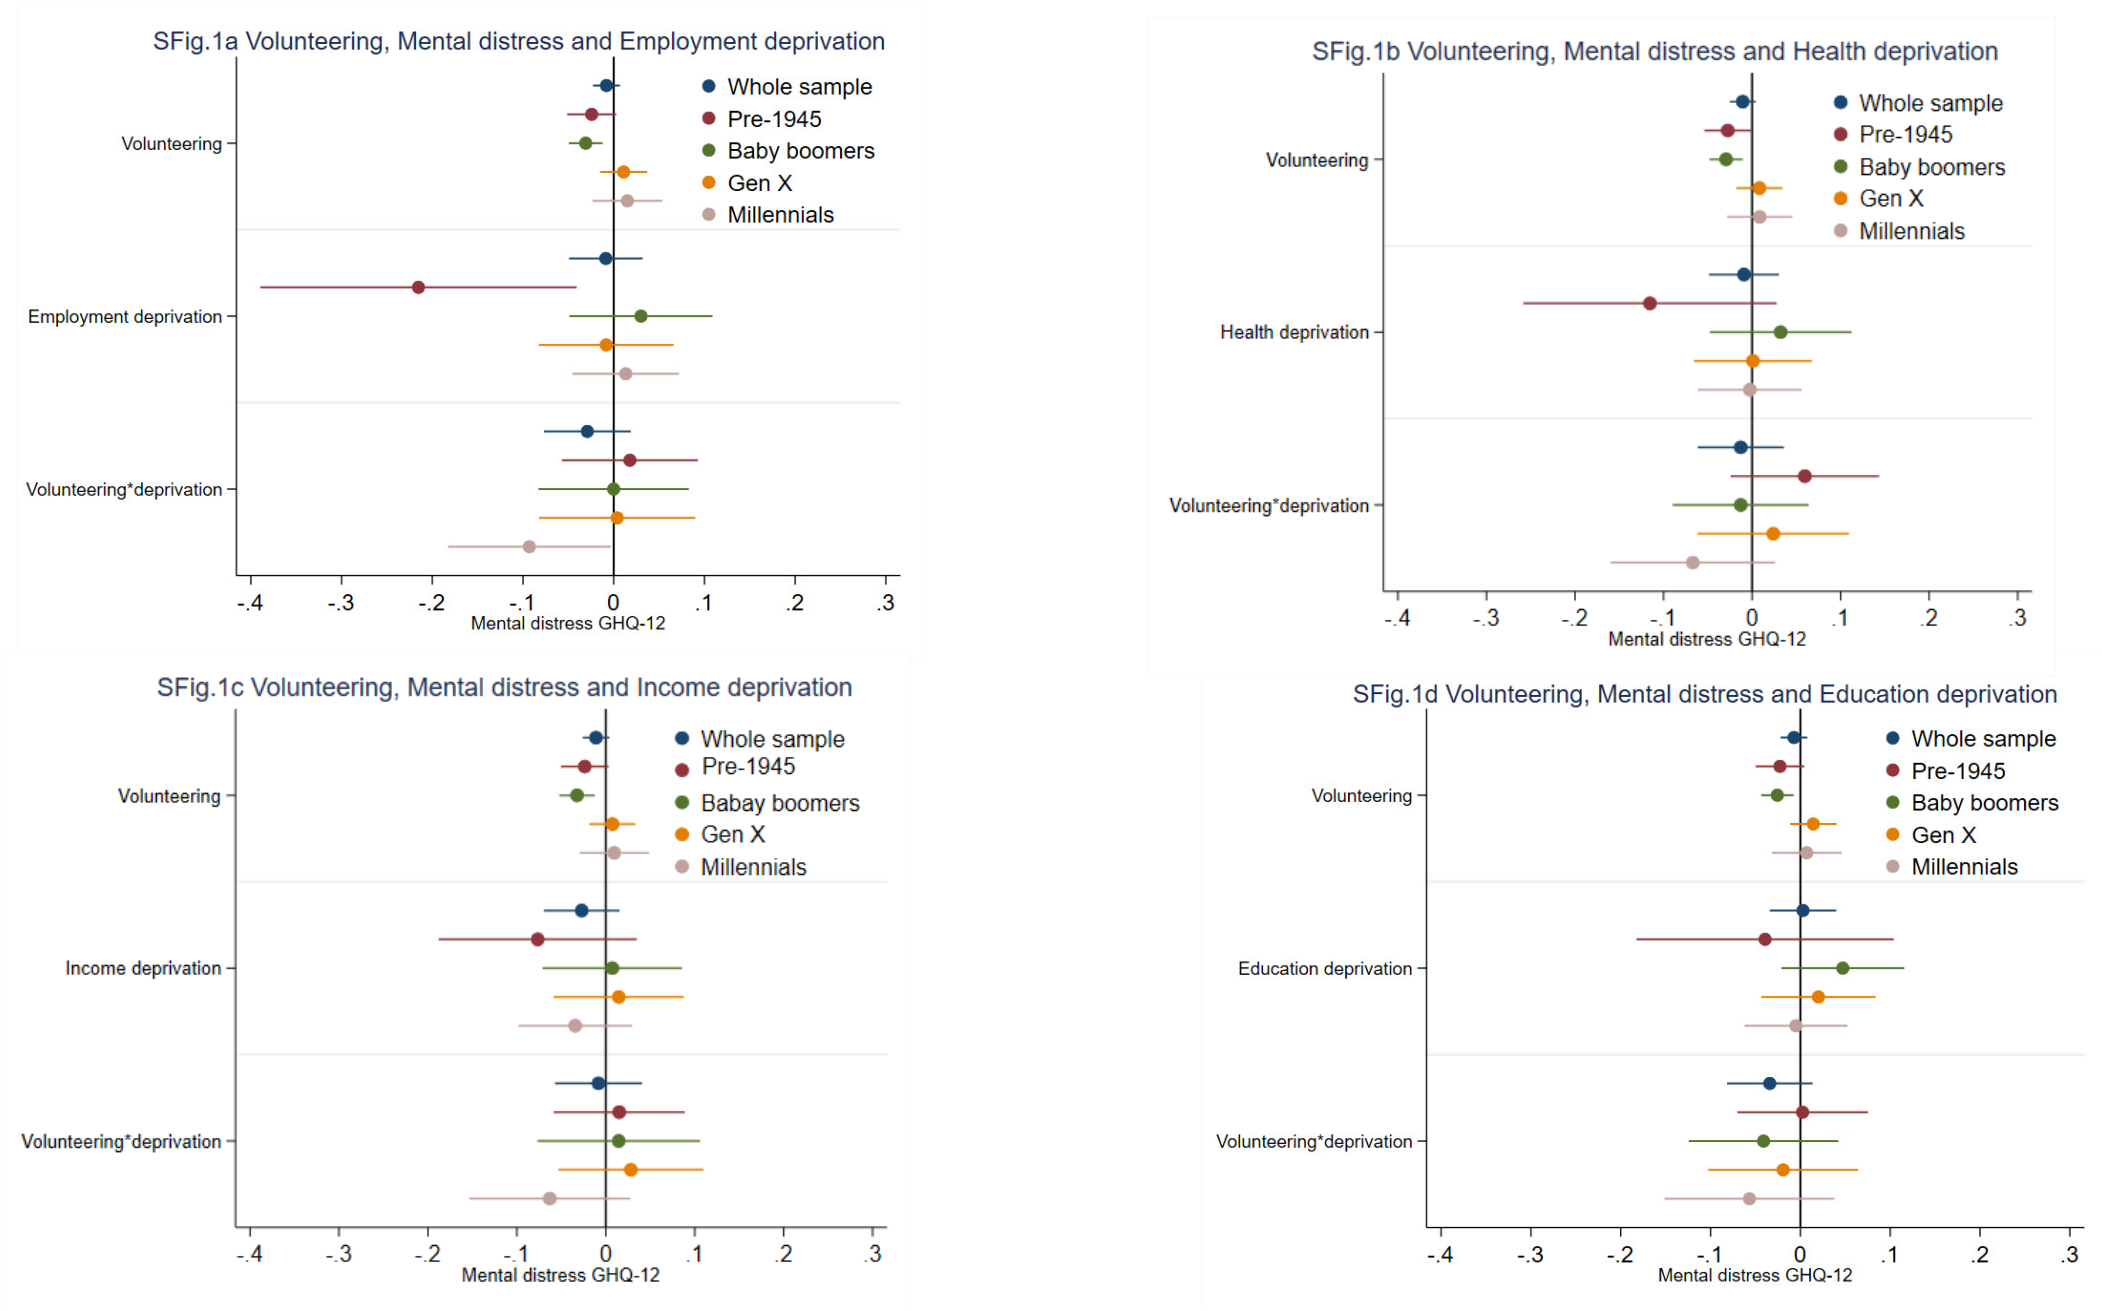

SFig.1e Volunteering, Mental distress and Crime

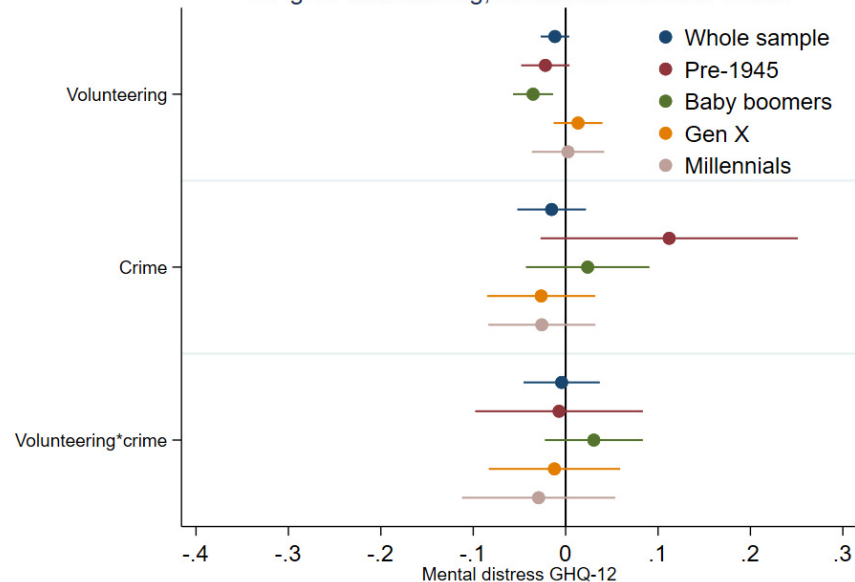

SFig.1f Volunteering, Mental distress and Housing deprivation

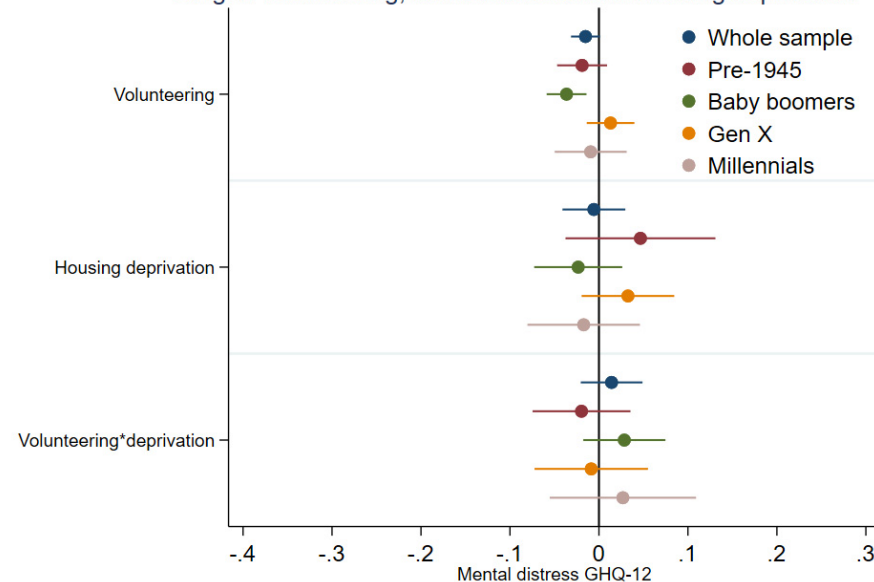

SFig.1g Volunteering, Mental distress and Living environment deprivation

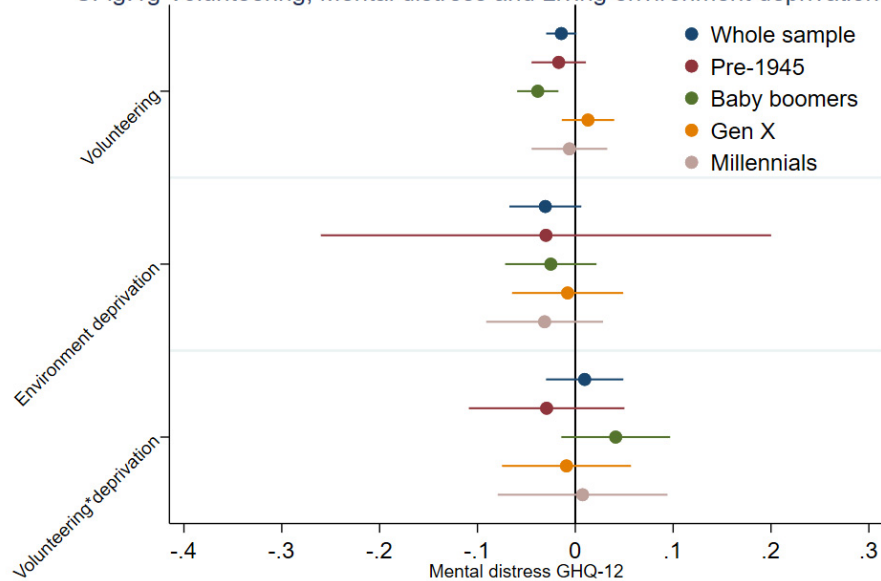

Figure S2: Volunteering, quality of life and deprivation

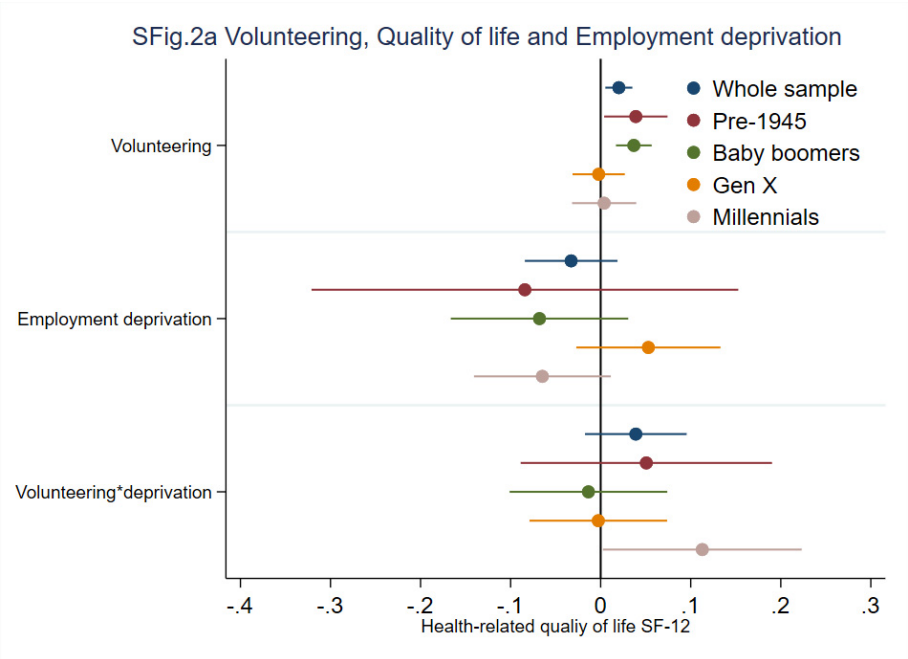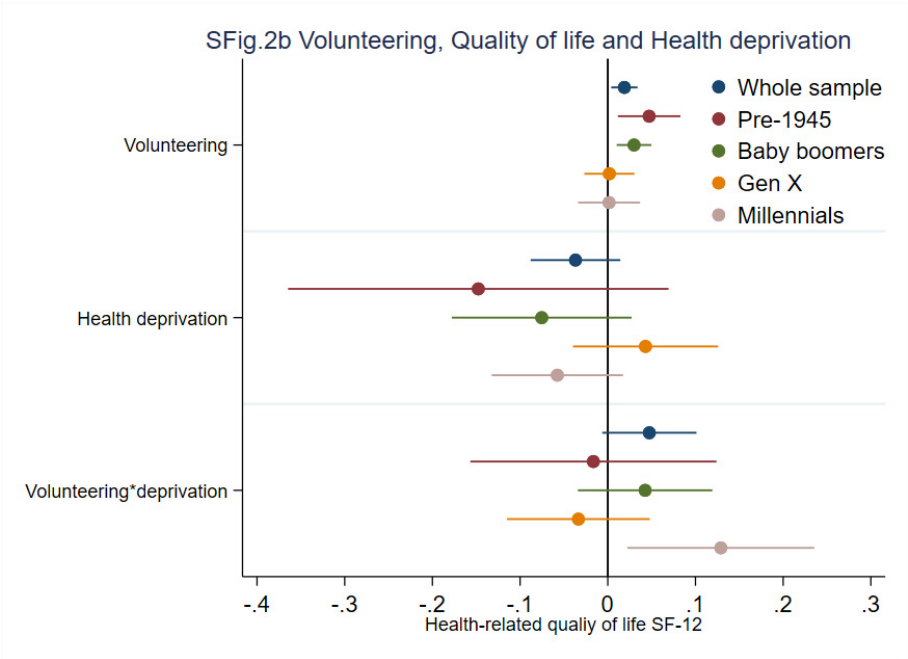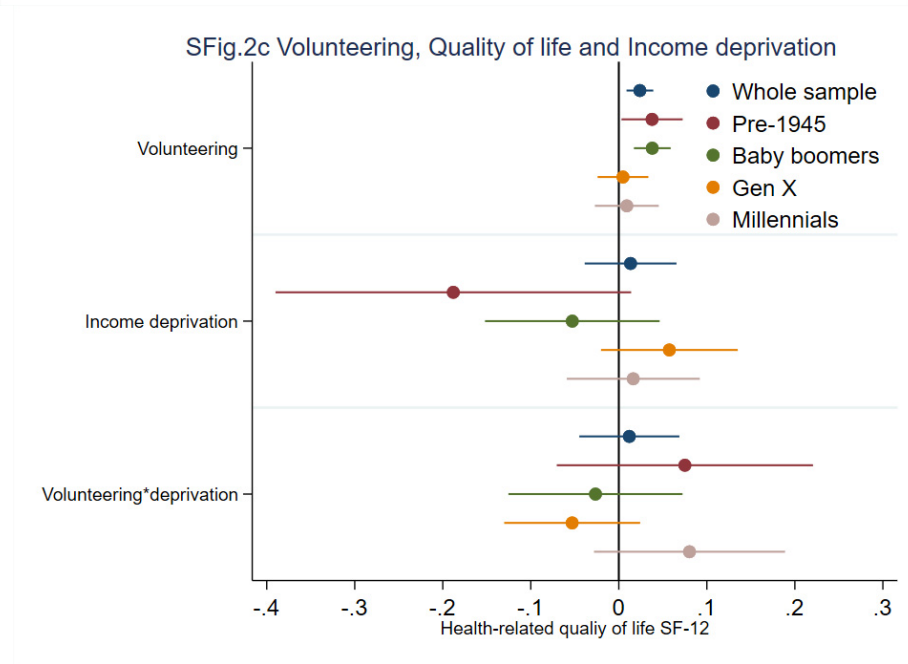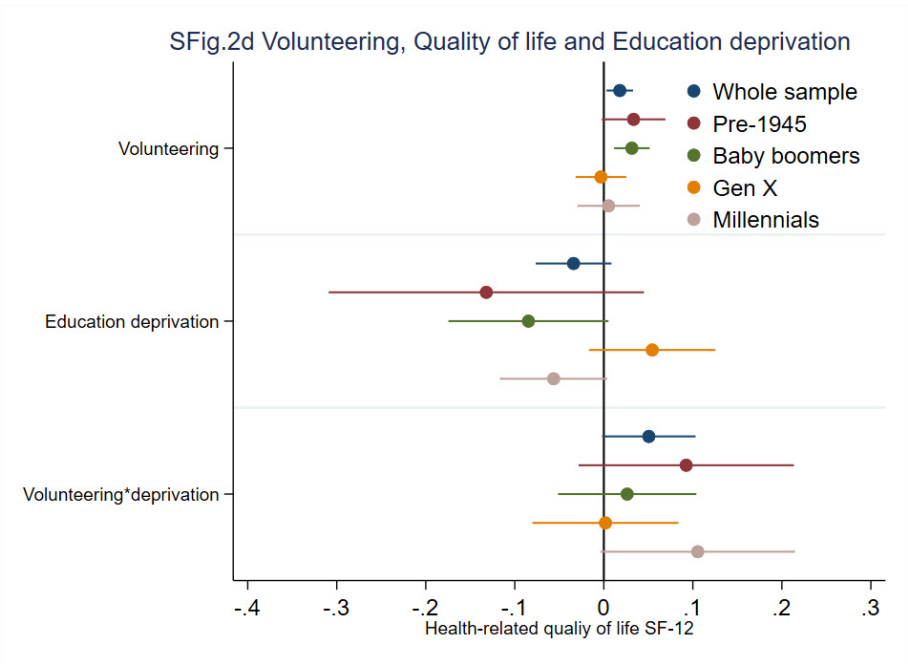

SFig.2e Volunteering, Quality of life and Crime

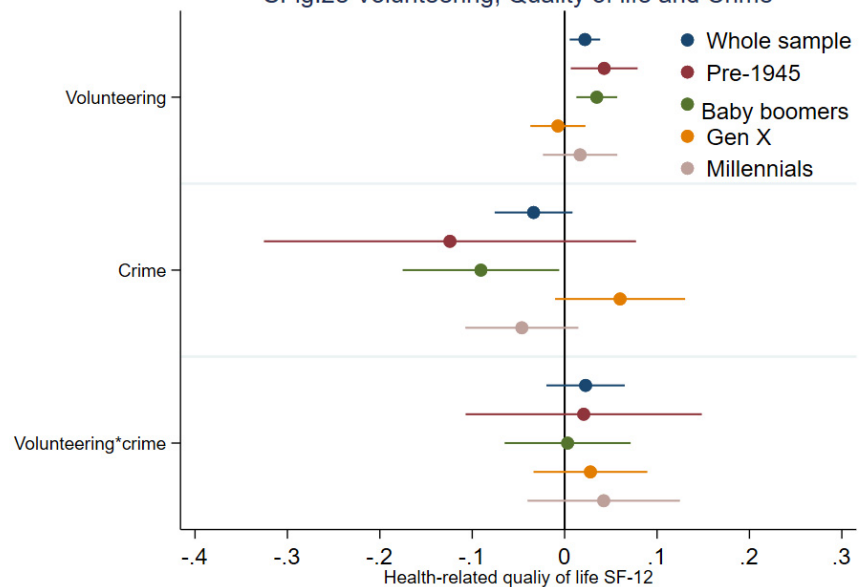

SFig.2f Volunteering, Quality of life and Housing deprivation

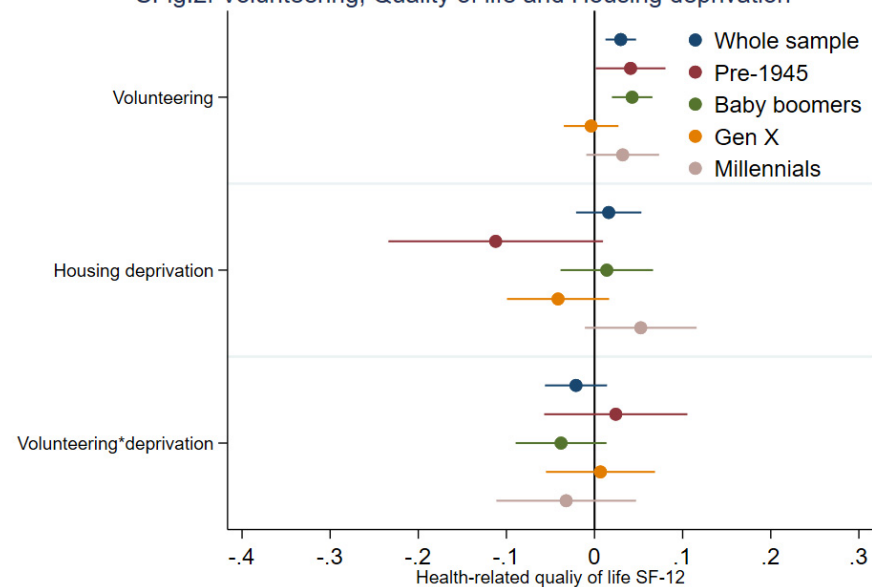

SFig.2g Volunteering, Quality of life and Living environment deprivation

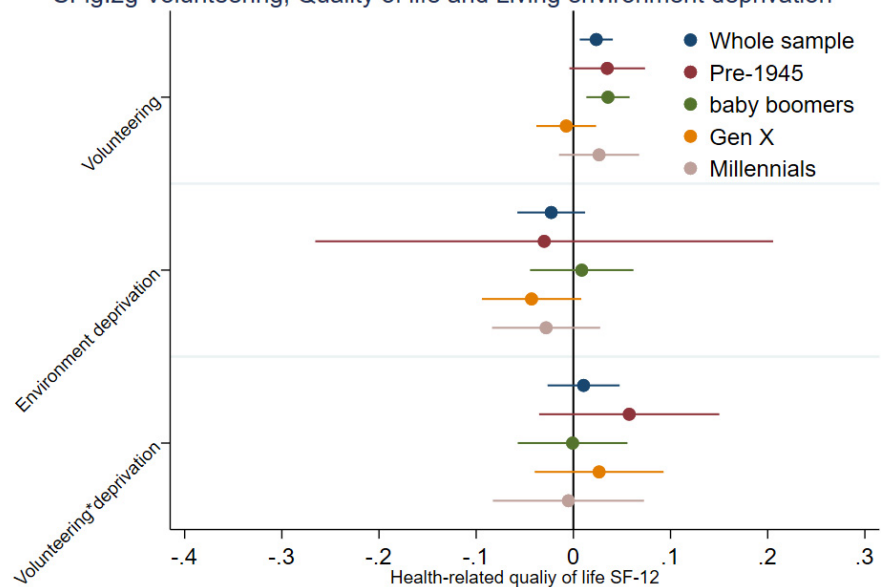

Table S5 Fixed effects models interacting with index of multiple deprivation (IMD) rank

|                                            | Mental distress (GHQ 12) |             |         | Health-related quality of life (SF-12) |                     |              | Number of obs | Number of groups |
|--------------------------------------------|--------------------------|-------------|---------|----------------------------------------|---------------------|--------------|---------------|------------------|
|                                            | Coef                     | 95%CI       | p-value | Coef                                   | 95%CI               | p-value      |               |                  |
| <b>Whole sample</b>                        |                          |             |         |                                        |                     |              | 51,206        | 10,989           |
| Volunteering                               | -0.02                    | -0.06, 0.01 | 0.226   | <b>0.06</b>                            | <b>0.02, 0.10</b>   | <b>0.005</b> |               |                  |
| IMD rank                                   | 0.00                     | -0.00, 0.00 | 0.452   | 0.00                                   | -0.00, 0.00         | 0.172        |               |                  |
| Volunteering*IMD rank                      | 0.00                     | -0.00, 0.00 | 0.479   | -0.00                                  | -0.00, 0.00         | 0.053        |               |                  |
| <b>Pre-1945 (born before 1945)</b>         |                          |             |         |                                        |                     |              | 7,351         | 1,491            |
| Volunteering                               | -0.02                    | -0.08, 0.04 | 0.461   | 0.09                                   | -0.01, 0.18         | 0.082        |               |                  |
| IMD rank                                   | 0.00                     | -0.00, 0.00 | 0.368   | 0.00                                   | -0.00, 0.00         | 0.056        |               |                  |
| Volunteering*IMD rank                      | 0.00                     | -0.00, 0.00 | 0.987   | -0.00                                  | -0.00, 0.00         | 0.348        |               |                  |
| <b>Baby Boomers (born in 1945-64)</b>      |                          |             |         |                                        |                     |              | 21,809        | 4,431            |
| Volunteering                               | -0.02                    | -0.08, 0.04 | 0.442   | 0.03                                   | -0.03, 0.09         | 0.378        |               |                  |
| IMD rank                                   | -0.00                    | -0.00, 0.00 | 0.221   | 0.00                                   | -0.00, 0.00         | 0.205        |               |                  |
| Volunteering*IMD rank                      | -0.00                    | -0.00, 0.00 | 0.770   | 0.00                                   | -0.00, 0.00         | 0.754        |               |                  |
| <b>Gen X (born in 1965-79)</b>             |                          |             |         |                                        |                     |              | 13,256        | 2,702            |
| Volunteering                               | -0.01                    | -0.07, 0.04 | 0.614   | 0.02                                   | -0.04, 0.08         | 0.574        |               |                  |
| IMD rank                                   | 0.00                     | -0.00, 0.00 | 0.889   | -0.00                                  | -0.00, 0.00         | 0.199        |               |                  |
| Volunteering*IMD rank                      | 0.00                     | -0.00, 0.00 | 0.286   | -0.00                                  | -0.00, 0.00         | 0.405        |               |                  |
| <b>Millennials (born in 1980 or after)</b> |                          |             |         |                                        |                     |              | 8,790         | 2,365            |
| Volunteering                               | -0.03                    | -0.11, 0.04 | 0.407   | <b>0.11</b>                            | <b>0.03, 0.19</b>   | <b>0.008</b> |               |                  |
| IMD rank                                   | 0.00                     | -0.00, 0.00 | 0.672   | 0.00                                   | -0.00, 0.00         | 0.052        |               |                  |
| Volunteering*IMD rank                      | 0.00                     | -0.00, 0.00 | 0.353   | <b>-0.00</b>                           | <b>-0.00, -0.00</b> | <b>0.011</b> |               |                  |

Notes: Notes: All models controlled all variables shown in the in-text analysis. Bold values denote statistical significance at the  $p < 0.05$  level.
